# Supplementary material
Source: PubMed Central journal article supplement (PMC6118064)
Supplement: kwy067_zhong_web_material_final.pdf [file kwy067_zhong_web_material_final.pdf]

**Web Material**

**Causal Model of the Association of Social Support With Antepartum Depression:  
A Marginal Structural Modeling Approach**

**Qiu-Yue Zhong, Bizu Gelaye, Tyler J. VanderWeele,  
Sixto E. Sanchez, and Michelle A. Williams**

**Web Table 1. Distributions of the Estimated Weights for Treatment and Censoring, PrOMIS, Peru, 2012-2014**

|                                          | Mean   | Standard<br>Deviation | Median | Percentile 1 | Percentile 25 | Percentile 75 | Percentile 99 |
|------------------------------------------|--------|-----------------------|--------|--------------|---------------|---------------|---------------|
| <b>Social Support Satisfaction Score</b> |        |                       |        |              |               |               |               |
| <b>Treatment weights</b>                 |        |                       |        |              |               |               |               |
| Interview 1                              |        |                       |        |              |               |               |               |
| Stabilized weights                       | 1.0000 | 0.1962                | 0.9656 | 0.7313       | 0.8437        | 1.1044        | 1.5395        |
| Unstabilized weights                     | 1.9999 | 0.4112                | 1.9067 | 1.4228       | 1.7047        | 2.2208        | 3.2460        |
| Interview 2                              |        |                       |        |              |               |               |               |
| Stabilized weights                       | 1.0000 | 0.1070                | 0.9805 | 0.8056       | 0.9210        | 1.0631        | 1.2883        |
| Unstabilized weights                     | 1.9994 | 0.4531                | 1.8991 | 1.3370       | 1.6824        | 2.2550        | 3.5792        |
| <b>Censoring weights</b>                 |        |                       |        |              |               |               |               |
| Stabilized weights                       | 1.0002 | 0.0157                | 0.9940 | 0.9785       | 0.9898        | 1.0191        | 1.0350        |
| Unstabilized weights                     | 1.4657 | 0.0879                | 1.4625 | 1.3099       | 1.3937        | 1.5302        | 1.6785        |
| <b>Final weights</b>                     |        |                       |        |              |               |               |               |
| Stabilized weights                       | 0.9996 | 0.2292                | 0.9637 | 0.6367       | 0.8236        | 1.1103        | 1.7311        |
| Unstabilized weights                     | 5.8395 | 1.7973                | 5.7242 | 3.1433       | 4.4271        | 6.8287        | 11.6101       |
| <b>Social Support Number Score</b>       |        |                       |        |              |               |               |               |
| <b>Treatment weights</b>                 |        |                       |        |              |               |               |               |
| Interview 1                              |        |                       |        |              |               |               |               |
| Stabilized weights                       | 1.0006 | 0.2480                | 0.9525 | 0.6293       | 0.8329        | 1.1078        | 1.8397        |
| Unstabilized weights                     | 2.0022 | 0.7289                | 1.8062 | 1.1922       | 1.5132        | 2.2199        | 4.7245        |
| Interview 2                              |        |                       |        |              |               |               |               |
| Stabilized weights                       | 1.0000 | 0.0469                | 0.9981 | 0.8976       | 0.9667        | 1.0260        | 1.1282        |
| Unstabilized weights                     | 2.0012 | 0.6943                | 1.7325 | 1.2544       | 1.5011        | 2.3642        | 4.3216        |
| <b>Censoring weights</b>                 |        |                       |        |              |               |               |               |
| Stabilized weights                       | 1.0003 | 0.0158                | 0.9940 | 0.9784       | 0.9895        | 1.0189        | 1.0352        |
| Unstabilized weights                     | 1.4655 | 0.0864                | 1.4603 | 1.3162       | 1.3966        | 1.5295        | 1.6730        |
| <b>Final weights</b>                     |        |                       |        |              |               |               |               |

|                      |        |        |        |        |        |        |         |
|----------------------|--------|--------|--------|--------|--------|--------|---------|
| Stabilized weights   | 0.9979 | 0.2521 | 0.9469 | 0.6254 | 0.8287 | 1.1066 | 1.8598  |
| Unstabilized weights | 5.8188 | 2.7163 | 5.2884 | 2.4606 | 3.6427 | 7.3126 | 15.0951 |

---

**Web Table 2. Characteristics of Women Who Were Lost to Follow-up, PrOMIS, Peru, 2012-2014**

| Characteristics                                                   | Not lost to follow up<br>(N=2,292) |      | Lost to follow up<br>(N=1,044) |      | P-value |
|-------------------------------------------------------------------|------------------------------------|------|--------------------------------|------|---------|
|                                                                   | N                                  | %    | N                              | %    |         |
| Maternal age (years) <sup>a</sup>                                 | 28.2 (6.2)                         |      | 28.2 (6.6)                     |      | 0.90    |
| Maternal age (years)                                              |                                    |      |                                |      |         |
| 18-19                                                             | 112                                | 4.9  | 60                             | 5.8  | 0.19    |
| 20-29                                                             | 1,278                              | 55.8 | 581                            | 55.7 |         |
| 30-34                                                             | 501                                | 21.9 | 201                            | 19.3 |         |
| ≥35                                                               | 401                                | 17.5 | 202                            | 19.4 |         |
| Education (years)                                                 |                                    |      |                                |      |         |
| ≤6                                                                | 94                                 | 4.1  | 51                             | 4.9  | 0.06    |
| 7-12                                                              | 1,223                              | 53.4 | 593                            | 56.8 |         |
| >12                                                               | 968                                | 42.2 | 398                            | 38.1 |         |
| Mestizo Ethnicity                                                 | 1,738                              | 75.8 | 771                            | 73.9 | 0.26    |
| Married/living with partner                                       | 1,859                              | 81.1 | 832                            | 79.7 | 0.30    |
| Employed during pregnancy                                         | 1,047                              | 45.7 | 486                            | 46.6 | 0.65    |
| Access to basic foods                                             |                                    |      |                                |      |         |
| Hard                                                              | 1,138                              | 49.7 | 520                            | 49.8 | 0.89    |
| Not very hard                                                     | 1,154                              | 50.3 | 522                            | 50.0 |         |
| Planned pregnancy                                                 | 963                                | 42.0 | 433                            | 41.5 | 0.79    |
| Nulliparous                                                       | 1,139                              | 49.7 | 491                            | 47.0 | 0.16    |
| Gestational age (weeks) at interview 1 <sup>a</sup>               | 9.6 (3.5)                          |      | 8.6 (3.3)                      |      | <0.0001 |
| Early pregnancy body mass index (kg/m <sup>2</sup> ) <sup>b</sup> |                                    |      |                                |      |         |
| <18.5                                                             | 42                                 | 1.8  | 21                             | 2.0  | 0.10    |
| 18.5-24.9                                                         | 1,117                              | 48.7 | 471                            | 45.1 |         |
| 25-29.9                                                           | 835                                | 36.4 | 380                            | 36.4 |         |
| ≥30                                                               | 276                                | 12.0 | 154                            | 14.8 |         |
| Childhood abuse                                                   | 1,661                              | 72.5 | 713                            | 68.3 | 0.01    |
| Lifetime intimate partner violence (physical or sexual)           | 800                                | 34.9 | 411                            | 39.4 | 0.01    |
| Lifetime abuse                                                    |                                    |      |                                |      |         |
| No abuse                                                          | 485                                | 21.2 | 249                            | 23.9 | 0.001   |
| Childhood abuse only                                              | 1,003                              | 43.8 | 380                            | 36.4 |         |

|                                               |       |      |     |      |      |
|-----------------------------------------------|-------|------|-----|------|------|
| Intimate partner violence only                | 146   | 6.4  | 82  | 7.9  |      |
| Childhood abuse and intimate partner violence | 654   | 28.5 | 329 | 31.5 |      |
| Depression (Interview 1)                      | 627   | 27.4 | 313 | 30.0 | 0.12 |
| Low satisfaction with social support          | 1,193 | 52.1 | 567 | 54.3 | 0.23 |
| Low number of available support providers     | 1,390 | 60.6 | 647 | 62.0 | 0.47 |

<sup>a</sup>Values are expressed as mean (standard deviation)

<sup>b</sup>Weight (kg)/height (m)<sup>2</sup>

**Web Table 3. Inverse-Probability-of-Treatment Weighted Estimates of the Parameters of a Marginal Structural Model for the Causal Association of Low Social Support on Antepartum Depression in Late Pregnancy, PrOMIS, Peru, 2012-2014**

| <b>Covariates</b>                                              | <b>aOR</b> | <b>Valid Conservative 95% CI<sup>c</sup></b> |
|----------------------------------------------------------------|------------|----------------------------------------------|
| <b>Satisfaction with Social Support (before pregnancy)</b>     |            |                                              |
| High                                                           | Reference  |                                              |
| Low <sup>a</sup>                                               | 0.88       | 0.57, 1.35                                   |
| <b>Satisfaction with Social Support (since being pregnant)</b> |            |                                              |
| High                                                           | Reference  |                                              |
| Low <sup>b</sup>                                               | 1.43       | 0.97, 2.10                                   |
| Interaction term                                               | 1.12       | 0.66, 1.90                                   |
| <b>Time-independent baseline covariates</b>                    |            |                                              |
| Maternal age (years)                                           |            |                                              |
| 18-19                                                          | 1.00       | 0.54, 1.86                                   |
| 20-29                                                          | Reference  |                                              |
| 30-34                                                          | 0.98       | 0.70, 1.38                                   |
| ≥35                                                            | 1.21       | 0.85, 1.71                                   |
| Education (years)                                              |            |                                              |
| ≤6                                                             | 1.22       | 0.66, 2.24                                   |
| 7-12                                                           | 1.20       | 0.92, 1.56                                   |
| >12                                                            | Reference  |                                              |
| Race/ethnicity                                                 |            |                                              |
| Mestizo                                                        | Reference  |                                              |
| Other                                                          | 1.12       | 0.84, 1.49                                   |
| Marital status                                                 |            |                                              |
| Married/living with partner                                    | Reference  |                                              |
| Other                                                          | 1.36       | 0.97, 1.90                                   |
| Access to basic foods                                          |            |                                              |
| Hard                                                           | 1.55       | 1.20, 2.00                                   |
| Not very hard                                                  | Reference  |                                              |
| Planned pregnancy                                              |            |                                              |
| Yes                                                            | Reference  |                                              |
| No                                                             | 1.51       | 1.15, 1.98                                   |
| Parity                                                         |            |                                              |

|                                               |           |            |
|-----------------------------------------------|-----------|------------|
| Nulliparous                                   | Reference |            |
| Multiparous                                   | 1.32      | 0.99, 1.78 |
| Lifetime abuse                                |           |            |
| No abuse                                      | Reference |            |
| Childhood abuse only                          | 1.44      | 0.94, 2.19 |
| Intimate partner violence only                | 2.53      | 1.42, 4.49 |
| Childhood abuse and intimate partner violence | 3.58      | 2.37, 5.43 |

Abbreviations: aOR, adjusted odds ratio; OR, odds ratio; CI, confidence interval

<sup>a</sup>Low social support satisfaction before pregnancy was defined as social support satisfaction score  $\leq 33$ .

<sup>b</sup>Low social support satisfaction since being pregnant was defined as social support satisfaction score  $\leq 32$ .

<sup>c</sup>Estimates were calculated using stabilized weights.

**Web Table 4. Inverse-Probability-of-Treatment Weighted Estimates of the Parameters of a Marginal Structural Model for the Causal Associations of Low Social Support on Antepartum Depression in Late Pregnancy, PrOMIS, Peru, 2012-2014**

| <b>Covariates</b>                                                   | <b>aOR</b> | <b>Valid Conservative 95% CI</b> |
|---------------------------------------------------------------------|------------|----------------------------------|
| <b>Number of Available Support Providers (before pregnancy)</b>     |            |                                  |
| High                                                                | Reference  |                                  |
| Low <sup>a</sup>                                                    | 0.84       | 0.54, 1.31                       |
| <b>Number of Available Support Providers (since being pregnant)</b> |            |                                  |
| High                                                                | Reference  |                                  |
| Low <sup>b</sup>                                                    | 1.38       | 0.89, 2.14                       |
| Interaction term                                                    | 1.40       | 0.80, 2.44                       |
| <b>Time-independent baseline covariates</b>                         |            |                                  |
| <b>Maternal age (years)</b>                                         |            |                                  |
| 18-19                                                               | 1.02       | 0.55, 1.89                       |
| 20-29                                                               | Reference  |                                  |
| 30-34                                                               | 0.92       | 0.65, 1.29                       |
| ≥35                                                                 | 1.13       | 0.79, 1.62                       |
| <b>Education (years)</b>                                            |            |                                  |
| ≤6                                                                  | 1.09       | 0.58, 2.03                       |
| 7-12                                                                | 1.19       | 0.91, 1.55                       |
| >12                                                                 | Reference  |                                  |
| <b>Race/ethnicity</b>                                               |            |                                  |
| Mestizo                                                             | Reference  |                                  |
| Other                                                               | 1.11       | 0.82, 1.49                       |
| <b>Marital status</b>                                               |            |                                  |
| Married/living with partner                                         | Reference  |                                  |
| Other                                                               | 1.39       | 0.99, 1.95                       |
| <b>Access to basic foods</b>                                        |            |                                  |
| Hard                                                                | 1.51       | 1.16, 1.95                       |
| Not very hard                                                       | Reference  |                                  |
| <b>Planned pregnancy</b>                                            |            |                                  |
| Yes                                                                 | Reference  |                                  |
| No                                                                  | 1.55       | 1.18, 2.03                       |
| <b>Parity</b>                                                       |            |                                  |

|                                               |           |            |
|-----------------------------------------------|-----------|------------|
| Nulliparous                                   | Reference |            |
| Multiparous                                   | 1.33      | 0.99, 1.79 |
| Lifetime abuse                                |           |            |
| No abuse                                      | Reference |            |
| Childhood abuse only                          | 1.54      | 1.01, 2.34 |
| Intimate partner violence only                | 2.65      | 1.48, 4.73 |
| Childhood abuse and intimate partner violence | 3.80      | 2.49, 5.80 |

Abbreviations: aOR, adjusted odds ratio; OR, odds ratio; CI, confidence interval

<sup>a</sup>Low number of available support providers before pregnancy was defined as social support number score  $\leq 8$ .

<sup>b</sup>Low number of available support providers since being pregnant was defined as social support number score  $\leq 8$ .

<sup>c</sup>Estimates were calculated using stabilized weights.

**Web Table 5. Associations Between Social Support and Antepartum Depression in Late Pregnancy, PrOMIS, Peru, 2012-2014**

| Social support<br>(before pregnancy)             | Social support<br>(since being<br>pregnant) | Marginal Structural<br>Model |            | Multivariate Logistic<br>Regression |            |
|--------------------------------------------------|---------------------------------------------|------------------------------|------------|-------------------------------------|------------|
|                                                  |                                             | aOR                          | 95% CI     | aOR                                 | 95% CI     |
| <b>Satisfaction with Social Support</b>          |                                             |                              |            |                                     |            |
| Low <sup>a</sup>                                 | Low <sup>b</sup>                            | 1.41                         | 0.99, 1.99 | 1.45                                | 1.01, 2.07 |
| Low                                              | High                                        | 0.88                         | 0.57, 1.35 | 0.91                                | 0.60, 1.40 |
| High                                             | Low                                         | 1.43                         | 0.97, 2.10 | 1.51                                | 1.03, 2.22 |
| High                                             | High                                        |                              | Reference  |                                     | Reference  |
| <b>Number of Available Support<br/>Providers</b> |                                             |                              |            |                                     |            |
| Low <sup>c</sup>                                 | Low <sup>d</sup>                            | 1.62                         | 1.12, 2.34 | 1.43                                | 0.99, 2.06 |
| Low                                              | High                                        | 0.84                         | 0.54, 1.31 | 0.75                                | 0.48, 1.17 |
| High                                             | Low                                         | 1.38                         | 0.89, 2.14 | 1.39                                | 0.90, 2.16 |
| High                                             | High                                        |                              | Reference  |                                     | Reference  |

Abbreviations: aOR, adjusted odds ratio; CI, confidence interval

<sup>a</sup>Low social support satisfaction before pregnancy was defined as social support satisfaction score  $\leq 33$ .

<sup>b</sup>Low social support satisfaction since being pregnant was defined as social support satisfaction score  $\leq 32$ .

<sup>c</sup>Low number of available support providers before pregnancy was defined as social support number score  $\leq 8$ .

<sup>d</sup>Low number of available support providers since being pregnant was defined as social support number score  $\leq 8$ .
